# Supplementary material for: Five Co(ii) coordination polymers with different counter anions based on [3,5-di(4H-1,2,4-triazol-4-yl)benzoato]− ligand: directed synthesis, structures and magnetic properties
Source: Royal Society of Chemistry journal article supplement (doi:10.1039/c7ra07089f), 2017-01-01
Supplement: c7ra07089f1.pdf [file c7ra07089f1.pdf]

# Five Co(II) coordination polymers with different counter anions based on [3,5-di(4H-1,2,4-triazol-4-yl) benzoato]<sup>-</sup> ligand: Directed synthesis, structures and magnetic properties

Wen-Hong Jiang,<sup>a</sup> Han-Zhong Zhang,<sup>a</sup> Guang-Feng Hou,<sup>b</sup> Dong-Sheng Ma,<sup>a</sup> Bin Liu,<sup>a</sup>

Ying-Hui Yu<sup>\*a</sup>

<sup>a</sup> School of Chemistry and Materials Science, Heilongjiang University, Harbin 150080, PR China.

E-mail: [yuyinghui@hlju.edu.cn](mailto:yuyinghui@hlju.edu.cn) (Y.-H. Yu). Fax: +86-451-86609151.

<sup>b</sup> Agricultural college, Heilongjiang University, Harbin 150080, PR China.

<sup>a</sup>School of Chemistry and Materials Science, Heilongjiang University, Harbin 150080, China. Fax: +86-451-86609001; Tel: +86-451-866090151; E-mail: [yuyinghui@hlju.edu.cn](mailto:yuyinghui@hlju.edu.cn)

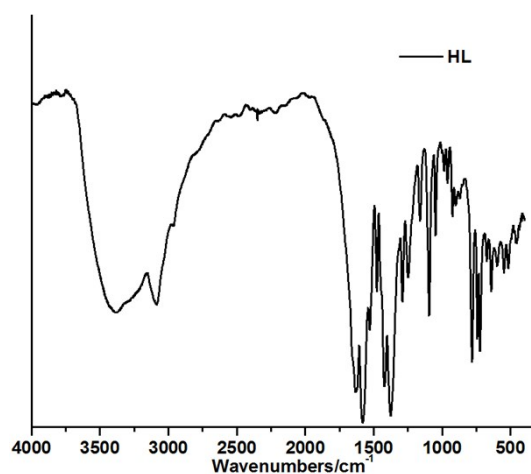

Fig. S1 IR of ligand HL

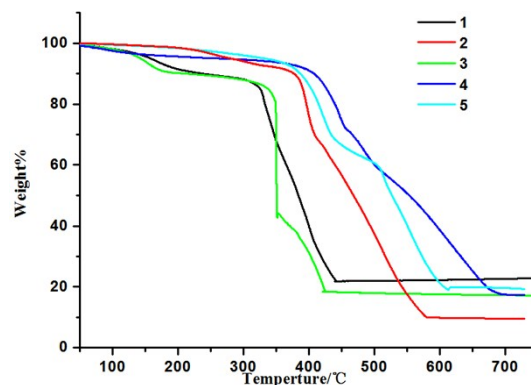

Fig. S2 TGA of complexes 1–5.

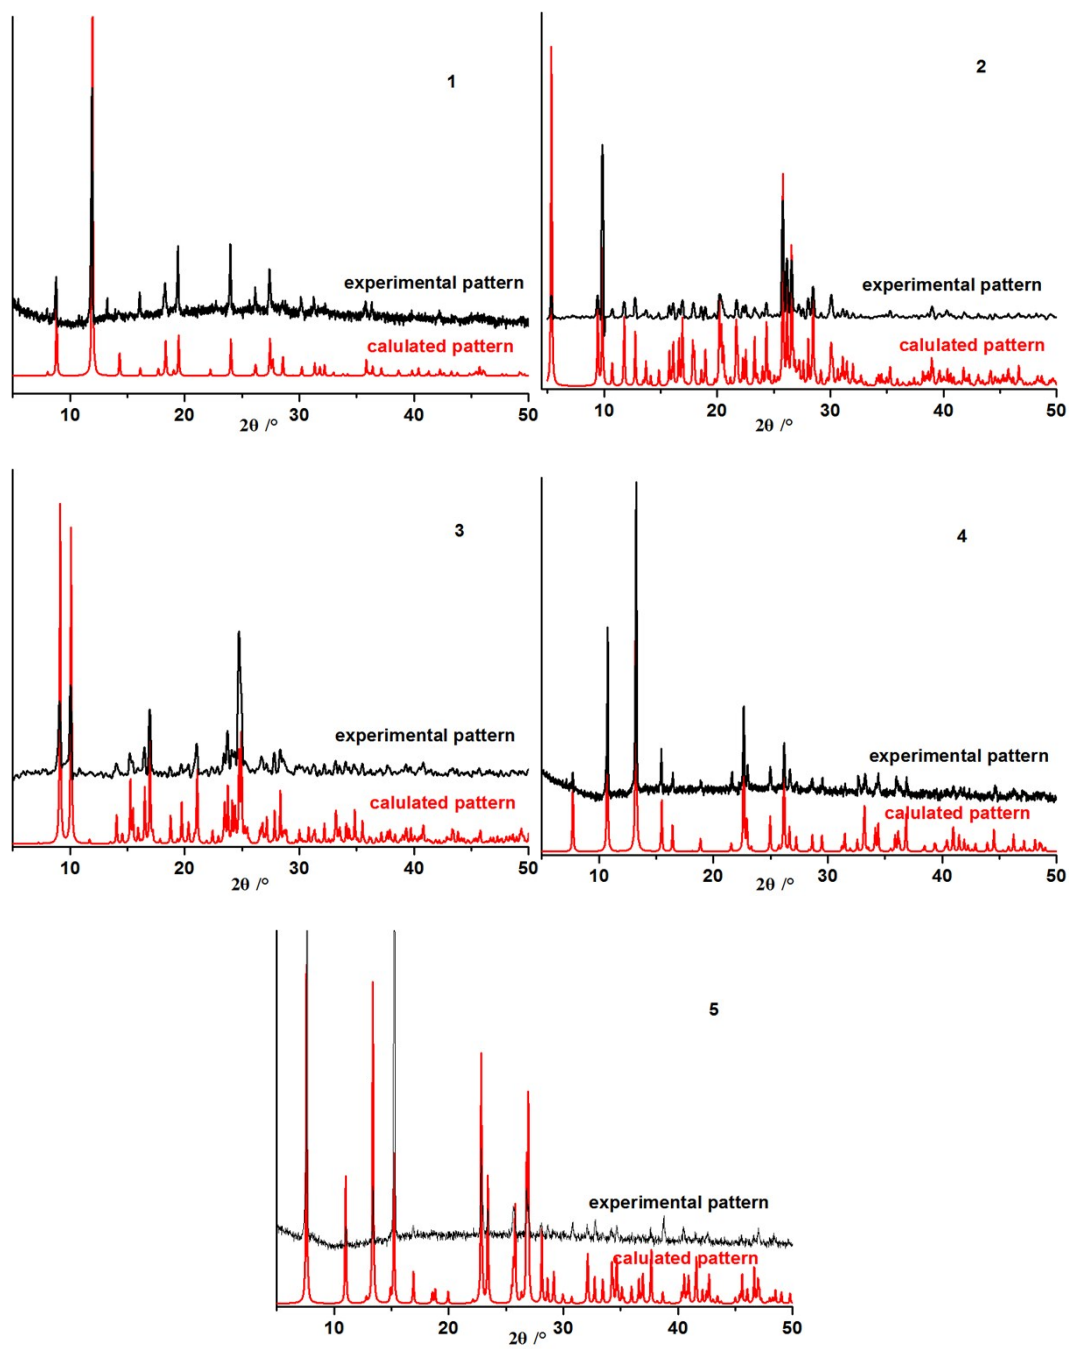

Fig. S3 PXRD compare chart of complexes 1–5.

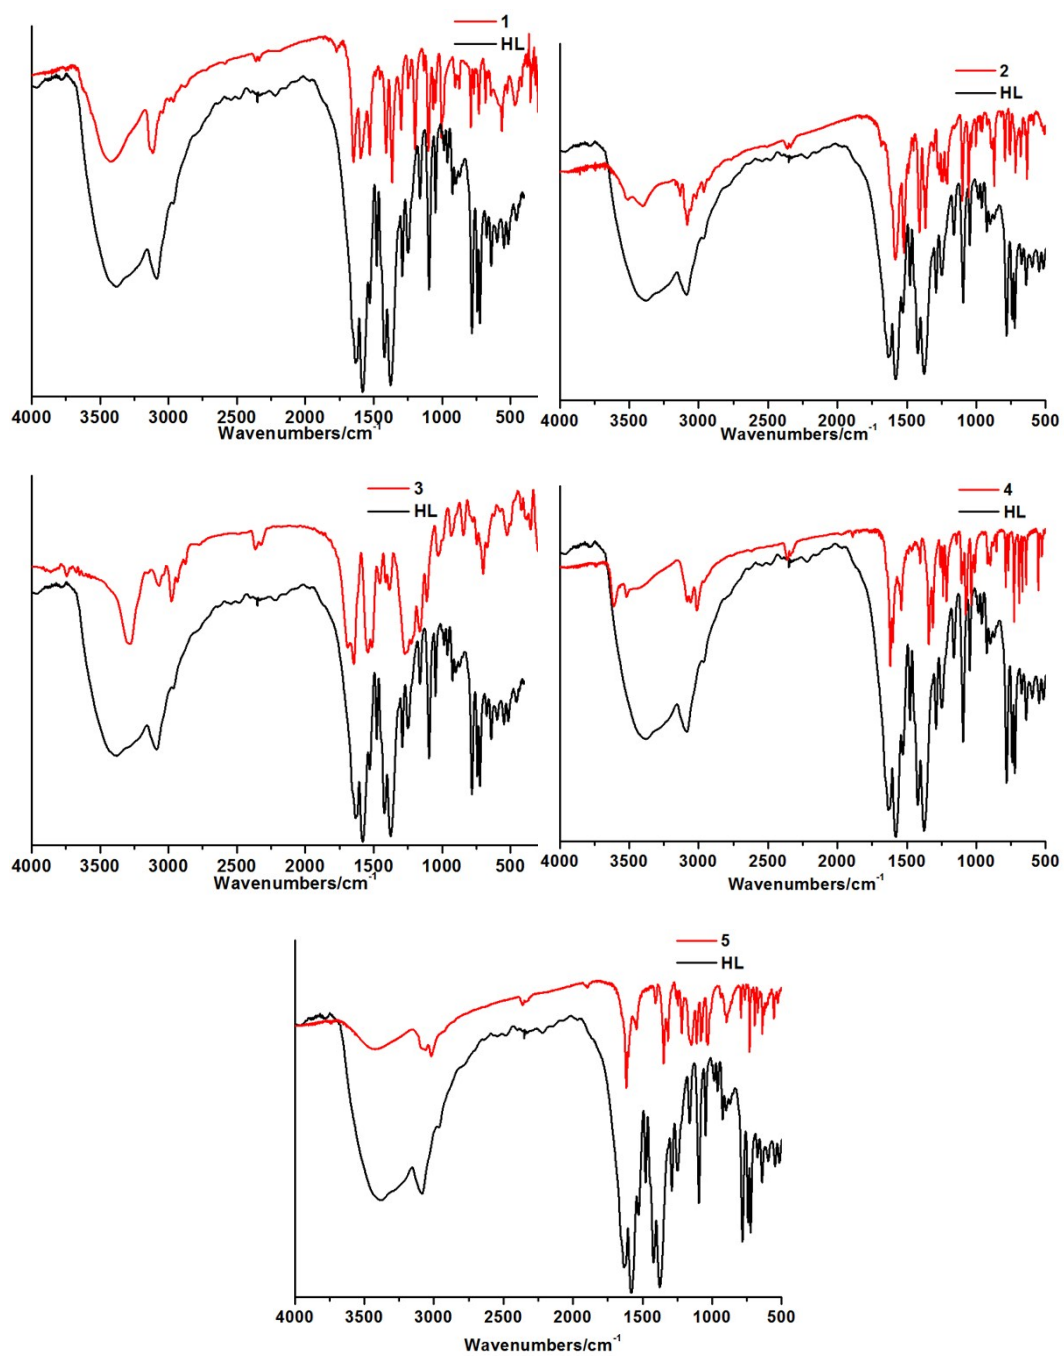

Fig. S4 The IR of complexes 1–5.

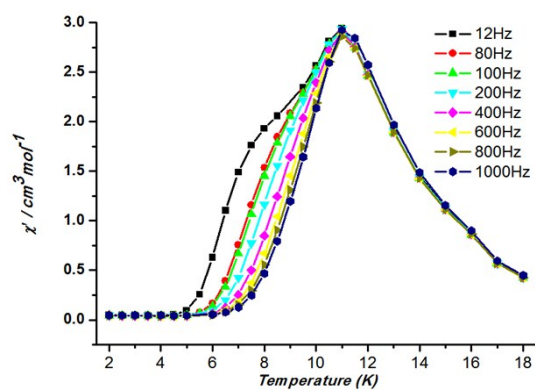

**Fig. S5** Temperature dependence of the in-phase ac susceptibility ( $\chi'$ ) between 12 and 1000 Hz at

$H_{dc} = 0$  Oe for **1**.

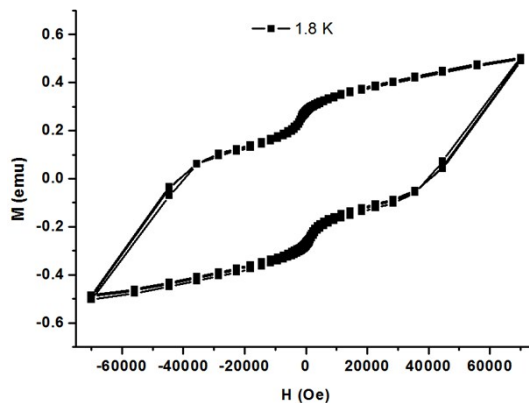

**Fig. S6** The hysteresis loop for **1** at 1.8k.

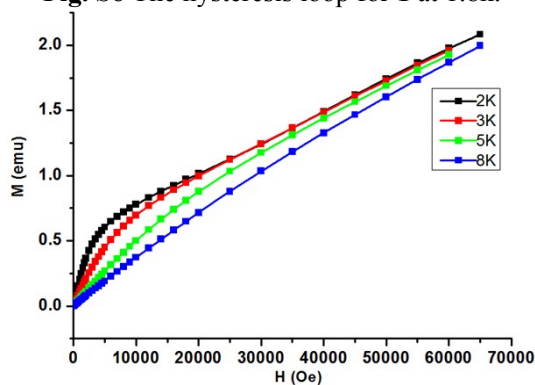

**Fig. S7** Magnetization M versus the magnetic field H for **3** at different low temperatures.

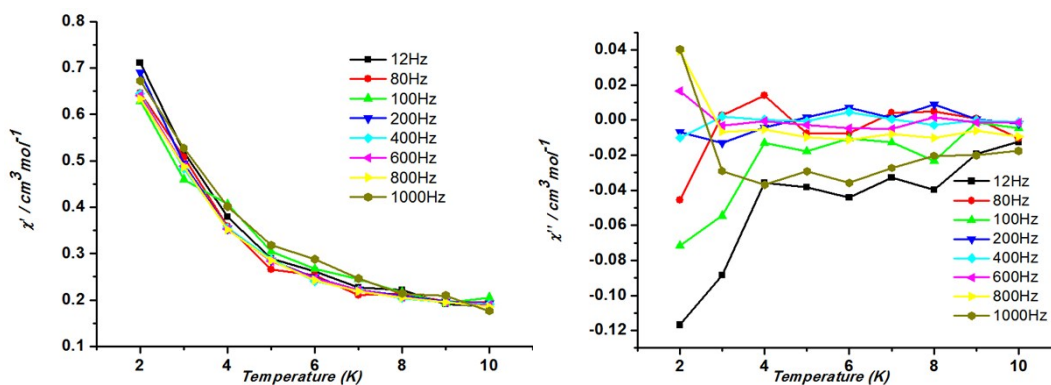

**Fig. S8** Temperature dependence of the in-phase ac susceptibility ( $\chi'$ ) and the out-of-phase ac susceptibility ( $\chi''$ ) between 12 and 1000 Hz at  $H_{dc} = 0$  Oe for **3**.

**Table S1.** Selected bond distances (Å) and angles (°) for **1–5**

| Complex <b>1</b> |          |                |          |
|------------------|----------|----------------|----------|
| Co(1)-O(2)       | 1.990(4) | Co(1)-O(2)#VI  | 1.995(4) |
| Co(1)-N(3)#IV    | 2.190(3) | Co(1)-N(3)#III | 2.190(3) |

|                                                                                                                                      |            |                        |            |
|--------------------------------------------------------------------------------------------------------------------------------------|------------|------------------------|------------|
| Co(1)-N(2)                                                                                                                           | 2.196(3)   | Co(1)-O(2)-Co(1)#III   | 117.2(2)   |
| O(2)-Co(1)-O(2)#VI                                                                                                                   | 179.75(13) | O(2)-Co(1)-N(3)#IV     | 85.32(13)  |
| O(2)#VI-Co(1)-N(3)#IV                                                                                                                | 94.49(14)  | O(2)-Co(1)-N(3)#III    | 85.32(13)  |
| O(2)#VI-Co(1)-N(3)#III                                                                                                               | 94.49(14)  | N(3)#IV-Co(1)-N(3)#III | 81.75(18)  |
| O(2)-Co(1)-N(2)#II                                                                                                                   | 94.73(13)  | O(2)#VI-Co(1)-N(2)#II  | 85.46(13)  |
| N(3)#IV-Co(1)-N(2)#II                                                                                                                | 98.39(13)  | N(3)#III-Co(1)-N(2)#II | 179.86(13) |
| O(2)-Co(1)-N(2)                                                                                                                      | 94.73(13)  | O(2)#VI-Co(1)-N(2)     | 85.46(13)  |
| N(3)#IV-Co(1)-N(2)                                                                                                                   | 179.86(13) | N(3)#III-Co(1)-N(2)    | 98.39(13)  |
| N(2)#II-Co(1)-N(2)                                                                                                                   | 81.47(18)  |                        |            |
| Symmetry Code: #I -x+2,y,z #II x,y,-z+3/2 #III -x+3/2,y+1/2,z #IV -<br>x+3/2,y+1/2,-z+3/2 #V 3/2-x, -1/2+y, 3/2-z #VI -x+3/2,y-1/2,z |            |                        |            |
| <b>Complex 2</b>                                                                                                                     |            |                        |            |
| Co(1)-O(1)                                                                                                                           | 2.074(2)   | Co(1)-O(4)#I           | 2.092(2)   |
| Co(1)-O(5)                                                                                                                           | 2.1121(19) | Co(1)-N(8)#III         | 2.135(2)   |
| Co(1)-O(3)                                                                                                                           | 2.1363(18) | Co(1)-N(6)#II          | 2.174(2)   |
| O(3)-Co(1)-N(6)#II                                                                                                                   | 175.72(8)  | O(1)-Co(1)-O(4)#1      | 176.88(8)  |
| O(1)-Co(1)-O(5)                                                                                                                      | 92.96(8)   | O(4)#I-Co(1)-O(5)      | 84.61(8)   |
| O(1)-Co(1)-N(8)#III                                                                                                                  | 92.75(9)   | O(4)#I-Co(1)-N(8)#III  | 89.57(9)   |
| O(5)-Co(1)-N(8)#III                                                                                                                  | 173.51(9)  | O(1)-Co(1)-O(3)        | 91.16(8)   |
| O(4)#I-Co(1)-O(3)                                                                                                                    | 87.00(8)   | O(5)-Co(1)-O(3)        | 92.80(7)   |
| N(8)#III-Co(1)-O(3)                                                                                                                  | 84.02(8)   | O(1)-Co(1)-N(6)#II     | 89.61(9)   |
| O(4)#I-Co(1)-N(6)#II                                                                                                                 | 92.04(8)   | O(5)-Co(1)-N(6)#II     | 82.95(8)   |
| N(8)#III-Co(1)-N(6)#II                                                                                                               | 100.16(9)  |                        |            |
| Symmetry Code: #I -x+1,y+1/2,-z+1/2 #II x,-y+3/2,z+1/2 #III -x+1,-y+2,-z<br>#IV x,-y+3/2,z-1/2 #V -x+1,y-1/2,-z+1/2                  |            |                        |            |
| <b>Complex 3</b>                                                                                                                     |            |                        |            |
| Co(1)-O(3)#III                                                                                                                       | 2.021(4)   | Co(1)-O(1)             | 2.049(3)   |
| Co(1)-N(9)#II                                                                                                                        | 2.133(4)   | Co(1)-N(6)#I           | 2.150(4)   |
| Co(1)-N(1)                                                                                                                           | 2.150(4)   | Co(1)-O(9)             | 2.278(3)   |

|                        |                         |                        |                        |
|------------------------|-------------------------|------------------------|------------------------|
| Co(2)-N(8)             | 2.114(4)                | Co(2)-N(8)#V           | 2.114(4)               |
| Co(2)-N(5)#IV          | 2.119(4)                | Co(2)-N(5)#VI          | 2.119(4)               |
| Co(2)-N(2)#VII         | 2.137(4)                | Co(2)-N(2)#II          | 2.137(4)               |
| O(3)#III-Co(1)-O(1)    | 95.54(15)               | O(3)#III-Co(1)-N(9)#II | 94.28(16)              |
| O(1)-Co(1)-N(9)#II     | 86.22(16)               | O(3)#III-Co(1)-N(6)#I  | 87.92(16)              |
| O(1)-Co(1)-N(6)#I      | 176.16(16)              | N(9)#II-Co(1)-N(6)#I   | 91.86(16)              |
| O(3)#III-Co(1)-N(1)    | 172.72(16)              | O(1)-Co(1)-N(1)        | 90.21(16)              |
| N(9)#II-Co(1)-N(1)     | 90.54(16)               | N(6)#I-Co(1)-N(1)      | 86.47(17)              |
| O(3)#III-Co(1)-O(9)    | 81.09(12)               | O(1)-Co(1)-O(9)        | 91.05(15)              |
| N(9)#II-Co(1)-O(9)     | 174.40(12)              | N(6)#I-Co(1)-O(9)      | 91.14(16)              |
| N(1)-Co(1)-O(9)        | 94.37(12)               | N(8)-Co(2)-N(8)#V      | 180.0(2)               |
| N(8)-Co(2)-N(5)#IV     | 89.64(17)               | N(8)#V-Co(2)-N(5)#IV   | 90.36(17)              |
| N(8)-Co(2)-N(5)#VI     | 90.36(17)               | N(8)#V-Co(2)-N(5)#VI   | 89.64(17)              |
| N(5)#IV-Co(2)-N(5)#VI  | 180.0(2)                | N(8)-Co(2)-N(2)#VII    | 89.28(16)              |
| N(8)#V-Co(2)-N(2)#VII  | 90.72(16)               | N(5)#IV-Co(2)-N(2)#VII | 88.58(17)              |
| N(5)#VI-Co(2)-N(2)#VII | 91.42(17)               | N(8)-Co(2)-N(2)#II     | 90.72(16)              |
| N(8)#V-Co(2)-N(2)#II   | 89.28(16)               | N(5)#IV-Co(2)-N(2)#II  | 91.42(17)              |
| N(5)#VI-Co(2)-N(2)#II  | 88.58(17)               | N(2)#VII-Co(2)-N(2)#II | 180.0                  |
| Co(1)-O(9)-Co(1)#IV    | 119.4(2)                |                        |                        |
| Symmetry Code:         | #I -x+3/2,y+1/2,-z+3/2  | #II -x+2,-y,-z+1       |                        |
|                        | #III x+1/2,-y+1/2,z-1/2 | #IV -x+2,y,-z+3/2      | #V -x+5/2,-y-1/2,-z+1  |
|                        | #VI x+1/2,-y-1/2,z-1/2  | #VII x+1/2,y-1/2,z     | #VIII x-1/2,y+1/2,z    |
|                        | #IX -x+3/2,y-1/2,-z+3/2 | #X -x+1,y,-z+3/2       | #XI x-1/2,-y+1/2,z+1/2 |
| <b>Complex 4</b>       |                         |                        |                        |
| Co(1)-N(2)             | 2.0996(18)              | Co(1)-N(2)#VI          | 2.0996(18)             |
| Co(1)-N(2)#VII         | 2.0996(18)              | Co(1)-N(2)#IV          | 2.0996(18)             |
| Co(1)-Cl(1)            | 2.4854(9)               | N(2)-Co(1)-N(2)#VI     | 180.0                  |
| N(2)-Co(1)-N(2)#VII    | 91.84(10)               | N(2)#VI-Co(1)-N(2)#VII | 88.16(10)              |
| N(2)-Co(1)-N(2)#IV     | 88.16(10)               | N(2)#VI-Co(1)-N(2)#IV  | 91.84(10)              |

|                                                                           |           |                         |           |
|---------------------------------------------------------------------------|-----------|-------------------------|-----------|
| N(2)#VII-Co(1)-N(2)#IV                                                    | 180.0     | N(2)-Co(1)-Cl(1)#VI     | 92.87(5)  |
| N(2)#VI-Co(1)-Cl(1)#VI                                                    | 87.13(5)  | N(2)#VII-Co(1)-Cl(1)#VI | 92.87(5)  |
| N(2)#IV-Co(1)-Cl(1)#VI                                                    | 87.13(5)  | N(2)-Co(1)-Cl(1)        | 87.13(5)  |
| N(2)#VI-Co(1)-Cl(1)                                                       | 92.87(5)  | N(2)#VII-Co(1)-Cl(1)    | 87.13(5)  |
| N(2)#IV-Co(1)-Cl(1)                                                       | 92.87(5)  | Cl(1)#VI-Co(1)-Cl(1)    | 180.0     |
| Co(1)#VIII-Cl(1)-Co(1)                                                    | 91.64(4)  |                         |           |
| Symmetry Code: #I -x+1/2,-y+1,z #II x, 1-y, z #III -x+1/2,y,z             |           |                         |           |
| #IV -x+1,y,-z+1 #V 1/2+x, 2-y, 1-z #VI -x+1,-y+2,-z+1 #VII x,-y+2,z       |           |                         |           |
| #VIII -x+1/2,-y+2,z                                                       |           |                         |           |
| <b>Complex 5</b>                                                          |           |                         |           |
| Co(1)-N(1)                                                                | 2.080(4)  | Co(1)-N(1)#I            | 2.080(4)  |
| Co(1)-N(3)                                                                | 2.118(4)  | Co(1)-N(3)#I            | 2.118(4)  |
| Co(1)-O(3)                                                                | 2.155(3)  | Co(1)-O(1W)             | 2.252(4)  |
| N(1)-Co(1)-N(1)#I                                                         | 96.0(2)   | N(1)-Co(1)-N(3)         | 174.8(2)  |
| N(1)#I-Co(1)-N(3)                                                         | 85.92(12) | N(1)-Co(1)-N(3)#I       | 85.92(12) |
| N(1)#I-Co(1)-N(3)#I                                                       | 174.8(2)  | N(3)-Co(1)-N(3)#I       | 91.8(2)   |
| N(1)-Co(1)-O(3)                                                           | 97.65(14) | N(1)#I-Co(1)-O(3)       | 97.65(14) |
| N(3)-Co(1)-O(3)                                                           | 86.82(14) | N(3)#I-Co(1)-O(3)       | 86.82(14) |
| N(1)-Co(1)-O(1W)                                                          | 82.37(14) | N(1)#I-Co(1)-O(1W)      | 82.37(14) |
| N(3)-Co(1)-O(1W)                                                          | 93.15(15) | N(3)#I-Co(1)-O(1W)      | 93.15(15) |
| O(3)-Co(1)-O(1W)                                                          | 180.0(2)  |                         |           |
| Symmetry Code: #I x,-y+1,z #II -x+1,-y,z #III -x+2,-y+2,z #IV -x+2,-y+1,z |           |                         |           |
| #V -x+2,y,z #VI -x+1,y,z #VII -x+1,-y+1,z                                 |           |                         |           |

**Table S2.** Selected Hydrogen Bond Interactions in Complexes 1–5.

| D-H...A             | D-H/ Å | H...A/ Å | D...A/ Å | ∠D-H...A/deg |
|---------------------|--------|----------|----------|--------------|
| <b>Complex 2</b>    |        |          |          |              |
| O(5)-H(51)...O(3)#V | 0.85   | 2.04     | 2.872(3) | 166.1        |
| O(5)-H(51)...O(4)   | 0.85   | 2.37     | 2.797(3) | 111.3        |

|                                                                                                                                                                                               |      |      |           |       |
|-----------------------------------------------------------------------------------------------------------------------------------------------------------------------------------------------|------|------|-----------|-------|
| O(5)-H(52)...O(2)#I                                                                                                                                                                           | 0.85 | 1.88 | 2.698(3)  | 161.5 |
| O(6)-H(61)...O(2)#VI                                                                                                                                                                          | 0.85 | 2.28 | 3.000(6)  | 142.9 |
| O(6)-H(61)...O(6)#VI                                                                                                                                                                          | 0.85 | 2.50 | 3.025(12) | 120.5 |
| O(6)-H(62)...O(2)                                                                                                                                                                             | 0.85 | 2.14 | 2.914(5)  | 150.7 |
| O(6)-H(62)...O(5)#V                                                                                                                                                                           | 0.85 | 2.54 | 3.136(5)  | 127.9 |
| Symmetry Code: #I $-x+1, y+1/2, -z+1/2$ #II $x, -y+3/2, z+1/2$ #III $-x+1, -y+2, -z$<br>#IV $x, -y+3/2, z-1/2$ #V $-x+1, y-1/2, -z+1/2$ #VI $-x+1, -y+1, -z$                                  |      |      |           |       |
| <b>Complex 5</b>                                                                                                                                                                              |      |      |           |       |
| O(1W)-H(1W)...O(2W)                                                                                                                                                                           | 0.84 | 1.89 | 2.654(7)  | 151.2 |
| O(2W)-H(2W)...O(5)#VIII                                                                                                                                                                       | 0.84 | 1.96 | 2.792(6)  | 170.0 |
| O(2W)-H(2W)...O(6)#IX                                                                                                                                                                         | 0.84 | 2.14 | 2.919(11) | 153.0 |
| Symmetry Code: #I $x, -y+1, z$ #II $-x+1, -y, z$ #III $-x+2, -y+2, z$ #IV $-x+2, -y+1, z$<br>#V $-x+2, y, z$ #VI $-x+1, y, z$ #VII $-x+1, -y+1, z$<br>#VIII $x, y, z+1$ #IX $-x+1, -y+1, z+1$ |      |      |           |       |

### Experimental conditions for the synthesis of complexes

It was found that the temperature between 120 °C to 160 °C basically result in similar products with similar crystal morphology. Therefore, the experimental results under different temperatures were omitted. All the following experiments were carried out in a 16 mL Teflon lined stainless steel container and heated at 160 °C for 3 days.

**Table S3.** Experimental results.

|   | metal salt                                    | ligand   | Templates | Solvent system        | pH value | Experimental results     |
|---|-----------------------------------------------|----------|-----------|-----------------------|----------|--------------------------|
| 1 | 0.4 mmol<br>Co(NO <sub>3</sub> ) <sub>2</sub> | 0.4 mmol | —         | 8 mL H <sub>2</sub> O | 6        | Red-brown twin crystals  |
| 2 | 0.4 mmol<br>Co(NO <sub>3</sub> ) <sub>2</sub> | 0.4 mmol | —         | 8 mL EtOH             | 6        | Brown-black powder       |
| 3 | 0.4 mmol<br>Co(NO <sub>3</sub> ) <sub>2</sub> | 0.4 mmol | —         | 8 mL DMF              | 6        | Red-brown Block crystals |



|   |                                                |             |                                   |                                           |   |                                                         |
|---|------------------------------------------------|-------------|-----------------------------------|-------------------------------------------|---|---------------------------------------------------------|
|   |                                                |             |                                   |                                           |   | including single crystal (small)                        |
| 4 | 0.4 mmol<br>Co(NO <sub>3</sub> ) <sub>2</sub>  | 0.4<br>mmol | —                                 | 8 mL<br>CH <sub>3</sub> CN                | 6 | Brown-gray powder                                       |
| 5 | 0.1 mmol<br>Co(NO <sub>3</sub> ) <sub>2</sub>  | 0.1<br>mmol | —                                 | 8 mL H <sub>2</sub> O                     | 2 | Brown powder                                            |
| 6 | 0.1 mmol<br>Co(NO <sub>3</sub> ) <sub>2</sub>  | 0.1<br>mmol | —                                 | 8 mL H <sub>2</sub> O                     | 4 | Pink solution and red block crystals                    |
|   |                                                |             |                                   |                                           |   | including single crystal (small)                        |
| 7 | 0.1 mmol<br>Co(NO <sub>3</sub> ) <sub>2</sub>  | 0.1<br>mmol | —                                 | 8 mL H <sub>2</sub> O                     | 7 | Brown-yellow block crystals                             |
|   |                                                |             |                                   |                                           |   | including single crystal (small) and black powder       |
| 8 | 0.25 mmol<br>Co(NO <sub>3</sub> ) <sub>2</sub> | 0.2<br>mmol | —                                 | 4 mL EtOH<br>and 4 mL<br>H <sub>2</sub> O | — | Red block crystals                                      |
|   |                                                |             |                                   |                                           |   | including single crystal (small) and brown yellow block |
| 9 | 0.25 mmol<br>Co(NO <sub>3</sub> ) <sub>2</sub> | 0.2<br>mmol | 0.2 mmol H <sub>2</sub> O-<br>bdc | 4 mL EtOH<br>and 4 mL<br>H <sub>2</sub> O | — | Red needle single crystal and brown-yellow block single |

|    |                                                |             |                                         |                                           |   |                                                                       |
|----|------------------------------------------------|-------------|-----------------------------------------|-------------------------------------------|---|-----------------------------------------------------------------------|
|    |                                                |             |                                         |                                           |   | crystal (small)                                                       |
| 10 | 0.25 mmol<br>Co(NO <sub>3</sub> ) <sub>2</sub> | 0.2<br>mmol | 0.2 mmol H <sub>2</sub> O-<br>bdc       | 6 mL H <sub>2</sub> O                     | 2 | Brown block<br>single crystal<br>(opaque)                             |
| 11 | 0.25 mmol<br>Co(NO <sub>3</sub> ) <sub>2</sub> | 0.2<br>mmol | 0.2 mmol H <sub>2</sub> O-<br>bdc       | 6 mL H <sub>2</sub> O                     | 4 | Brown twinning<br>(opaque)                                            |
| 12 | 0.25 mmol<br>Co(NO <sub>3</sub> ) <sub>2</sub> | 0.2<br>mmol | 0.2 mmol H <sub>2</sub> O-<br>bdc       | 3 mL EtOH<br>and 3 mL<br>H <sub>2</sub> O | — | Brown-red<br>powder                                                   |
| 13 | 0.25 mmol<br>Co(NO <sub>3</sub> ) <sub>2</sub> | 0.2<br>mmol | 0.2 mmol H <sub>2</sub> O-<br>bdc       | 6 mL H <sub>2</sub> O                     | — | Brown block<br>single crystal<br>(opaque) and<br>brown-gray<br>powder |
| 14 | 0.25 mmol<br>Co(NO <sub>3</sub> ) <sub>2</sub> | 0.2<br>mmol | 0.2 mmol H <sub>2</sub> p-<br>bdc       | 6 mL H <sub>2</sub> O                     | — | Brown twin<br>crystals and<br>brown-gray<br>powder                    |
| 15 | 0.25 mmol<br>Co(NO <sub>3</sub> ) <sub>2</sub> | 0.2<br>mmol | 0.2 mmol 1,3,5-<br>H <sub>3</sub> btc   | 3 mL EtOH<br>and 3 mL<br>H <sub>2</sub> O | — | Brown-red<br>powder                                                   |
| 16 | 0.25 mmol<br>Co(NO <sub>3</sub> ) <sub>2</sub> | 0.2<br>mmol | 0.2 mmol 1,3,5-<br>H <sub>3</sub> btc   | 6 mL H <sub>2</sub> O                     | — | Brown-red<br>powder                                                   |
| 17 | 0.1 mmol<br>Co(NO <sub>3</sub> ) <sub>2</sub>  | 0.1<br>mmol | 0.1 mmol<br>1,2,4,5-H <sub>4</sub> btec | 8 mL H <sub>2</sub> O                     | — | Brown-gray<br>powder                                                  |
| 18 | 0.1 mmol<br>Co(NO <sub>3</sub> ) <sub>2</sub>  | 0.1<br>mmol | 0.1 mmol<br>Succinic acid               | 8 mL H <sub>2</sub> O                     | — | Brown powder                                                          |
| 19 | 0.1 mmol<br>Co(NO <sub>3</sub> ) <sub>2</sub>  | 0.1<br>mmol | 0.1 mmol<br>4,4'Bipyridinyl             | 8 mL H <sub>2</sub> O                     | — | Brown powder<br>and red-brown                                         |

|    |                                                |             |                                                       |                                           |   |                                                    |
|----|------------------------------------------------|-------------|-------------------------------------------------------|-------------------------------------------|---|----------------------------------------------------|
|    |                                                |             |                                                       |                                           |   | twin crystals                                      |
| 20 | 0.1 mmol<br>Co(NO <sub>3</sub> ) <sub>2</sub>  | 0.1<br>mmol | 0.1 mmol H <sub>2</sub> O-<br>bdc                     | 8 mL H <sub>2</sub> O                     | — | Brown powder                                       |
| 21 | 0.1 mmol<br>Co(NO <sub>3</sub> ) <sub>2</sub>  | 0.1<br>mmol | 0.1 mmol NaOH                                         | 10 mL H <sub>2</sub> O                    | — | Brown block<br>single crystal<br>(fragile)         |
| 22 | 0.1 mmol<br>Co(NO <sub>3</sub> ) <sub>2</sub>  | 0.1<br>mmol | 0.4 mmol NaOH                                         | 8 mL H <sub>2</sub> O                     | — | Brown-gray<br>powder                               |
| 23 | 0.1 mmol<br>Co(NO <sub>3</sub> ) <sub>2</sub>  | 0.1<br>mmol | 0.3 mmol NaOH<br>and 0.1 mmol<br>H <sub>2</sub> O-bdc | 8 mL H <sub>2</sub> O                     | — | Brown twin<br>crystals                             |
| 24 | 0.1 mmol<br>Co(NO <sub>3</sub> ) <sub>2</sub>  | 0.1<br>mmol | 0.3 mmol NaOH<br>and 0.1 mmol<br>H <sub>2</sub> O-bdc | 5 mL EtOH<br>and 5 mL<br>H <sub>2</sub> O | — | Brown-gray<br>powder                               |
| 25 | 0.15 mmol<br>Co(NO <sub>3</sub> ) <sub>2</sub> | 0.1<br>mmol | 0.3 mmol NaOH                                         | 2 mL EtOH<br>and 8 mL<br>H <sub>2</sub> O | — | Brown-gray<br>powder and<br>brown-yellow<br>powder |
| 26 | 0.15 mmol<br>Co(NO <sub>3</sub> ) <sub>2</sub> | 0.1<br>mmol | 0.3 mmol NaOH<br>and 0.1 mmol<br>H <sub>2</sub> O-bdc | 2 mL EtOH<br>and 8 mL<br>H <sub>2</sub> O | — | Brown twin<br>crystals                             |
| 27 | 0.1 mmol<br>Co(NO <sub>3</sub> ) <sub>2</sub>  | 0.1<br>mmol | 0.3 mmol NaOH                                         | 8 mL EtOH<br>and 2 mL<br>H <sub>2</sub> O | — | Brown-gray<br>powder                               |
| 28 | 0.1 mmol<br>Co(NO <sub>3</sub> ) <sub>2</sub>  | 0.1<br>mmol | 0.3 mmol NaOH                                         | 5 mL EtOH<br>and 5 mL<br>H <sub>2</sub> O | — | Brown-gray<br>powder                               |
| 29 | 0.1 mmol<br>Co(NO <sub>3</sub> ) <sub>2</sub>  | 0.1<br>mmol | 0.3 mmol NaOH                                         | 10 mL H <sub>2</sub> O                    | — | Brown-gray<br>powder                               |

|    |                                               |             |                                   |                                           |   |                                                                                                   |
|----|-----------------------------------------------|-------------|-----------------------------------|-------------------------------------------|---|---------------------------------------------------------------------------------------------------|
| 30 | 0.1 mmol<br>Co(NO <sub>3</sub> ) <sub>2</sub> | 0.1<br>mmol | —                                 | 10 mL H <sub>2</sub> O                    | — | Brown-gray<br>powder                                                                              |
| 31 | 0.1 mmol<br>Co(NO <sub>3</sub> ) <sub>2</sub> | 0.1<br>mmol | —                                 | 8 mL EtOH<br>and 2 mL<br>H <sub>2</sub> O | — | Red needle<br>single crystal<br>(small) and<br>brown block<br>single crystal<br>(opaque)          |
| 32 | 0.1 mmol<br>Co(NO <sub>3</sub> ) <sub>2</sub> | 0.1<br>mmol | —                                 | 5 mL EtOH<br>and 5 mL<br>H <sub>2</sub> O | — | Brown-yellow<br>block single<br>crystal, red<br>needle single<br>crystal and red<br>twin crystals |
| 33 | 0.1 mmol<br>Co(NO <sub>3</sub> ) <sub>2</sub> | 0.1<br>mmol | —                                 | 2 mL EtOH<br>and 8 mL<br>H <sub>2</sub> O | — | Brown-red<br>powder                                                                               |
| 34 | 0.1 mmol<br>Co(NO <sub>3</sub> ) <sub>2</sub> | 0.1<br>mmol | 0.1 mmol H <sub>2</sub> O-<br>bdc | 5 mL EtOH<br>and 5 mL<br>H <sub>2</sub> O | — | red-brown twin<br>crystals                                                                        |
| 35 | 0.1 mmol<br>Co(NO <sub>3</sub> ) <sub>2</sub> | 0.1<br>mmol | 0.1 mmol NaOH                     | 5 mL EtOH<br>and 5 mL<br>H <sub>2</sub> O | — | Brown block<br>single crystal<br>(small)                                                          |
| 36 | 0.2 mmol<br>Co(NO <sub>3</sub> ) <sub>2</sub> | 0.1<br>mmol | —                                 | 5 mL EtOH<br>and 5 mL<br>H <sub>2</sub> O | — | Red needle<br>single crystal                                                                      |
| 37 | 0.2 mmol<br>Co(NO <sub>3</sub> ) <sub>2</sub> | 0.1<br>mmol | —                                 | 5 mL EtOH<br>and 5 mL<br>H <sub>2</sub> O | — | Red needle<br>single crystal<br>and red twin                                                      |

|    |                                               |              |                                         |                                           |   |                                                                                     |
|----|-----------------------------------------------|--------------|-----------------------------------------|-------------------------------------------|---|-------------------------------------------------------------------------------------|
|    |                                               |              |                                         |                                           |   | crystals                                                                            |
| 38 | 0.4 mmol<br>Co(NO <sub>3</sub> ) <sub>2</sub> | 0.1<br>mmol  | —                                       | 5 mL EtOH<br>and 5 mL<br>H <sub>2</sub> O | — | Red needle<br>single crystal<br>and red twin<br>crystals                            |
| 39 | 0.1 mmol<br>Co(NO <sub>3</sub> ) <sub>2</sub> | 0.1<br>mmol  | 0.1 mmol<br>4,4'Bipyridinyl             | 5 mL EtOH<br>and 5 mL<br>H <sub>2</sub> O | — | Brown-yellow<br>block single<br>crystal and red<br>needle single<br>crystal (small) |
| 40 | 0.1 mmol<br>Co(NO <sub>3</sub> ) <sub>2</sub> | 0.1<br>mmol  | 0.1 mmol<br>Imidazole                   | 5 mL EtOH<br>and 5 mL<br>H <sub>2</sub> O | — | Brown-yellow<br>block single<br>crystal and red<br>needle single<br>crystal         |
| 41 | 0.1 mmol<br>Co(NO <sub>3</sub> ) <sub>2</sub> | 0.1<br>mmol  | 0.1 mmol<br>1,3,5-H <sub>3</sub> btc    | 5 mL EtOH<br>and 5 mL<br>H <sub>2</sub> O | — | Red block<br>crystals<br>including single<br>crystal                                |
| 42 | 0.1 mmol<br>Co(NO <sub>3</sub> ) <sub>2</sub> | 0.05<br>mmol | 0.05 mmol<br>1,3,5-H <sub>3</sub> btc   | 5 mL EtOH<br>and 5 mL<br>H <sub>2</sub> O | — | Purple twin<br>crystals                                                             |
| 43 | 0.1 mmol<br>Co(NO <sub>3</sub> ) <sub>2</sub> | 0.1<br>mmol  | 0.1 mmol<br>1,3,5-H <sub>3</sub> btc    | 5 mL EtOH<br>and 5 mL<br>H <sub>2</sub> O | — | Brown-red<br>powder                                                                 |
| 44 | 0.1 mmol<br>Co(NO <sub>3</sub> ) <sub>2</sub> | 0.1<br>mmol  | 0.1 mmol<br>1,2,4,5-H <sub>4</sub> btec | 2 mL EtOH<br>and 8 mL<br>H <sub>2</sub> O | — | Brown-red<br>powder                                                                 |
| 45 | 0.1 mmol                                      | 0.1          | 0.1 mmol                                | 5 mL EtOH                                 | — | Brown-red                                                                           |

|    |                                               |             |                                       |                                           |     |                                                                                                   |
|----|-----------------------------------------------|-------------|---------------------------------------|-------------------------------------------|-----|---------------------------------------------------------------------------------------------------|
|    | Co(NO <sub>3</sub> ) <sub>2</sub>             | mmol        | Succinic acid                         | and 5 mL<br>H <sub>2</sub> O              |     | powder and red<br>block crystals<br>including single<br>crystal (small)                           |
| 46 | 0.1 mmol<br>Co(NO <sub>3</sub> ) <sub>2</sub> | 0.1<br>mmol | 0.1 mmol<br>Propanedioic<br>acid      | 5 mL EtOH<br>and 5 mL<br>H <sub>2</sub> O | —   | Brown-yellow<br>block single<br>crystal, red<br>needle single<br>crystal and red<br>twin crystals |
| 47 | 0.1 mmol<br>Co(NO <sub>3</sub> ) <sub>2</sub> | 0.1<br>mmol | 0.1 mmol<br>Fumaric acid              | 5 mL EtOH<br>and 5 mL<br>H <sub>2</sub> O | —   | Red twin<br>crystals                                                                              |
| 48 | 0.1 mmol<br>Co(NO <sub>3</sub> ) <sub>2</sub> | 0.1<br>mmol | 0.1 mmol 1,2,4-<br>btc                | 5 mL EtOH<br>and 5 mL<br>H <sub>2</sub> O | —   | Brown-red<br>powder and red<br>block crystals<br>including single<br>crystal (small)              |
| 49 | 0.1 mmol<br>Co(NO <sub>3</sub> ) <sub>2</sub> | 0.1<br>mmol | 0.1 mmol 1,2,3-<br>btc                | 5 mL EtOH<br>and 5 mL<br>H <sub>2</sub> O |     | Brown-red<br>powder                                                                               |
| 50 | 0.1 mmol<br>Co(NO <sub>3</sub> ) <sub>2</sub> | 0.1<br>mmol | 0.1 mmol H <sub>2</sub> p-<br>bdc     | 5 mL EtOH<br>and 5 mL<br>H <sub>2</sub> O | 4.5 | Red twin<br>crystals                                                                              |
| 51 | 0.1 mmol<br>Co(NO <sub>3</sub> ) <sub>2</sub> | 0.1<br>mmol | 0.1 mmol H <sub>2</sub> o-<br>bdc     | 5 mL EtOH<br>and 5 mL<br>H <sub>2</sub> O | 4.5 | Red twin<br>crystals                                                                              |
| 52 | 0.1 mmol<br>Co(NO <sub>3</sub> ) <sub>2</sub> | 0.1<br>mmol | 0.1 mmol 1,3,5-<br>H <sub>3</sub> btc | 5 mL EtOH<br>and 5 mL                     | 4.5 | Purple twin<br>crystals                                                                           |

|    |                                               |             |                                          |                                                    |     |                                                              |
|----|-----------------------------------------------|-------------|------------------------------------------|----------------------------------------------------|-----|--------------------------------------------------------------|
|    |                                               |             |                                          | H <sub>2</sub> O                                   |     |                                                              |
| 53 | 0.1 mmol<br>Co(NO <sub>3</sub> ) <sub>2</sub> | 0.1<br>mmol | 0.1 mmol 1,2,3-<br>H <sub>3</sub> btc    | 5 mL EtOH<br>and 5 mL<br>H <sub>2</sub> O          | 4.5 | Purple twin<br>crystals and red<br>powder                    |
| 54 | 0.1 mmol<br>Co(NO <sub>3</sub> ) <sub>2</sub> | 0.1<br>mmol | 0.1 mmol<br>1,2,4-H <sub>3</sub> btc     | 5 mL EtOH<br>and 5 mL<br>H <sub>2</sub> O          | 4.5 | Red block<br>crystals<br>including single<br>crystal (small) |
| 55 | 0.1 mmol<br>Co(NO <sub>3</sub> ) <sub>2</sub> | 0.1<br>mmol | 0.1 mmol<br>1,2,4,5- H <sub>4</sub> btec | 5 mL EtOH<br>and 5 mL<br>H <sub>2</sub> O          | 4.5 | Purple twin<br>crystals and red<br>powder                    |
| 56 | 0.1 mmol<br>Co(NO <sub>3</sub> ) <sub>2</sub> | 0.1<br>mmol | 0.1 mmol 1,2,3-<br>H <sub>3</sub> btc    | 5 mL EtOH<br>and 5 mL<br>H <sub>2</sub> O          | 2   | Purple twin<br>crystals and red<br>powder                    |
| 57 | 0.1 mmol<br>Co(NO <sub>3</sub> ) <sub>2</sub> | 0.1<br>mmol | 0.1 mmol 1,2,3-<br>H <sub>3</sub> btc    | 5 mL EtOH<br>and 5 mL<br>H <sub>2</sub> O          | 3   | red twin<br>crystals and red<br>powder                       |
| 58 | 0.1 mmol<br>Co(NO <sub>3</sub> ) <sub>2</sub> | 0.1<br>mmol | 0.1 mmol 1,2,3-<br>H <sub>3</sub> btc    | 5 mL EtOH<br>and 5 mL<br>H <sub>2</sub> O          | 4   | Red twin<br>crystals                                         |
| 59 | 0.1 mmol<br>Co(NO <sub>3</sub> ) <sub>2</sub> | 0.1<br>mmol | 0.1 mmol 1,2,3-<br>H <sub>3</sub> btc    | 5 mL EtOH<br>and 5 mL<br>H <sub>2</sub> O          | 5   | Brown-yellow<br>crystal (small)<br>and red twin<br>crystals  |
| 60 | 0.1 mmol<br>Co(NO <sub>3</sub> ) <sub>2</sub> | 0.1<br>mmol | 0.1 mmol 1,2,3-<br>H <sub>3</sub> btc    | 5 mL EtOH<br>and 5 mL<br>H <sub>2</sub> O          | 6   | Gray powder                                                  |
| 61 | 0.1 mmol<br>Co(NO <sub>3</sub> ) <sub>2</sub> | 0.1<br>mmol | 0.1 mmol<br>1,3,5-H <sub>3</sub> btc     | 5 mL<br>CH <sub>3</sub> CN and<br>H <sub>2</sub> O | —   | Purple twin<br>crystals                                      |

|    |                                                |              |                                       |                                           |   |                                                                  |
|----|------------------------------------------------|--------------|---------------------------------------|-------------------------------------------|---|------------------------------------------------------------------|
|    |                                                |              |                                       | 5 mL H <sub>2</sub> O                     |   |                                                                  |
| 62 | 0.05 mmol<br>Co(NO <sub>3</sub> ) <sub>2</sub> | 0.05<br>mmol | 0.05 mmol<br>1,3,5-H <sub>3</sub> btc | 5 mL EtOH<br>and 5 mL<br>H <sub>2</sub> O | — | Red twin<br>crystals and<br>needle twin<br>crystals (little)     |
| 63 | 0.2 mmol<br>Co(NO <sub>3</sub> ) <sub>2</sub>  | 0.2m<br>mol  | 0.1 mmol<br>1,3,5-H <sub>3</sub> btc  | 5 mL EtOH<br>and 5 mL<br>H <sub>2</sub> O | — | Purple twin<br>crystals and<br>colorless needle<br>twin crystals |
| 64 | 0.4 mmol<br>Co(NO <sub>3</sub> ) <sub>2</sub>  | 0.4m<br>mol  | 0.1 mmol<br>1,3,5-H <sub>3</sub> btc  | 5 mL EtOH<br>and 5 mL<br>H <sub>2</sub> O | — | Red powder                                                       |
| 65 | 0.1 mmol<br>Co(NO <sub>3</sub> ) <sub>2</sub>  | 0.1m<br>mol  | 0.4 mmol<br>1,3,5-H <sub>3</sub> btc  | 5 mL EtOH<br>and 5 mL<br>H <sub>2</sub> O | — | Red twin<br>crystals                                             |
| 66 | 0.1 mmol<br>Co(NO <sub>3</sub> ) <sub>2</sub>  | 0.1<br>mmol  | 0.1 mmol<br>1,2,3-H <sub>3</sub> btc  | 4 mL EtOH<br>and 6 mL<br>H <sub>2</sub> O | — | Red twin<br>crystals                                             |
| 67 | 0.1 mmol<br>Co(NO <sub>3</sub> ) <sub>2</sub>  | 0.1<br>mmol  | 0.1 mmol<br>1,2,3-H <sub>3</sub> btc  | 6 mL EtOH<br>and 4 mL<br>H <sub>2</sub> O | — | Red twin<br>crystals and<br>needle twinning<br>(little)          |
| 68 | 0.1 mmol<br>Co(NO <sub>3</sub> ) <sub>2</sub>  | 0.1<br>mmol  | 0.1 mmol<br>1,2,3-H <sub>3</sub> btc  | 7 mL EtOH<br>and 3 mL<br>H <sub>2</sub> O | — | Red needle twin<br>crystals and red<br>powder                    |
| 69 | 0.1 mmol<br>CoCO <sub>3</sub>                  | 0.1<br>mmol  | —                                     | 5 mL EtOH<br>and 5 mL<br>H <sub>2</sub> O | — | Brown-yellow<br>block single<br>crystal (opaque)                 |
| 70 | 0.2 mmol                                       | 0.1          | —                                     | 5 mL EtOH                                 | — | Brown-yellow                                                     |



|    |                               |             |                                          |                                           |   |                                                                                    |
|----|-------------------------------|-------------|------------------------------------------|-------------------------------------------|---|------------------------------------------------------------------------------------|
|    | CoCO <sub>3</sub>             | mmol        |                                          | and 5 mL<br>H <sub>2</sub> O              | — | block single<br>crystal (small)<br>and brown-gray<br>powder                        |
| 71 | 0.1 mmol<br>CoCO <sub>3</sub> | 0.1<br>mmol | 0.1 mmol<br>Imidazole                    | 5 mL EtOH<br>and 5 mL<br>H <sub>2</sub> O | — | Brown-yellow<br>block single<br>crystal                                            |
| 72 | 0.1 mmol<br>CoCO <sub>3</sub> | 0.1<br>mmol | 0.1 mmol<br>H <sub>2</sub> <i>o</i> -bdc | 5 mL EtOH<br>and 5 mL<br>H <sub>2</sub> O | — | Brown twin<br>crystals and<br>brown-yellow<br>powder                               |
| 73 | 0.1 mmol<br>CoCO <sub>3</sub> | 0.1<br>mmol | 0.1 mmol<br>H <sub>2</sub> <i>p</i> -bdc | 5 mL EtOH<br>and 5 mL<br>H <sub>2</sub> O | — | Brown block<br>single crystal<br>(small) and red<br>twin crystals                  |
| 74 | 0.1 mmol<br>CoCO <sub>3</sub> | 0.1<br>mmol | 0.1 mmol<br>1,3,5-H <sub>3</sub> btc     | 5 mL EtOH<br>and 5 mL<br>H <sub>2</sub> O | — | Brown block<br>single crystal<br>(small), red<br>twin crystal and<br>purple powder |
| 75 | 0.1 mmol<br>CoCO <sub>3</sub> | 0.1<br>mmol | 0.1 mmol<br>H <sub>4</sub> btec          | 5 mL EtOH<br>and 5 mL<br>H <sub>2</sub> O | — | Purple powder                                                                      |
| 76 | 0.1 mmol<br>CoCO <sub>3</sub> | 0.1<br>mmol | —                                        | 2 mL EtOH<br>and 8 mL<br>H <sub>2</sub> O | — | Brown block<br>single crystal<br>(small) and<br>brown-gray<br>powder               |
| 77 | 0.1 mmol                      | 0.1         | —                                        | 2 mL EtOH                                 | — | Brown-gray                                                                         |

|    |                   |      |                      |                        |   |                 |
|----|-------------------|------|----------------------|------------------------|---|-----------------|
|    | CoCO <sub>3</sub> | mmol |                      | and 8 mL               |   | powder          |
|    |                   |      |                      | H <sub>2</sub> O       |   |                 |
| 78 | 0.1 mmol          | 0.1  | —                    | 10 mL                  | — | Brown-gray      |
|    | CoCO <sub>3</sub> | mmol |                      | EtOH                   |   | powder          |
| 79 | 0.1 mmol          | 0.1  | —                    | 10 mL H <sub>2</sub> O | — | Brown block     |
|    | CoCO <sub>3</sub> | mmol |                      |                        |   | single crystal  |
|    |                   |      |                      |                        |   | (small) and     |
|    |                   |      |                      |                        |   | powder          |
| 80 | 0.1 mmol          | 0.1  | 0.1 mmol             | 5 mL EtOH              | — | Brown block     |
|    | CoCO <sub>3</sub> | mmol | H <sub>2</sub> p-bdc | and 5 mL               |   | single crystal  |
|    |                   |      |                      | H <sub>2</sub> O       |   | (small) and red |
|    |                   |      |                      |                        |   | powder          |
| 81 | 0.4 mmol          | 0.4  | —                    | 10 mL H <sub>2</sub> O | 3 | Colorless       |
|    | CoCl <sub>2</sub> | mmol |                      |                        |   | needle single   |
|    |                   |      |                      |                        |   | crystal (small) |
|    |                   |      |                      |                        |   | and brown       |
|    |                   |      |                      |                        |   | powder          |
| 82 | 0.4 mmol          | 0.4  | —                    | 10 mL H <sub>2</sub> O | 7 | Brown powder    |
|    | CoCl <sub>2</sub> | mmol |                      |                        |   |                 |
| 83 | 0.1 mmol          | 0.1  | —                    | 5 mL EtOH              | — | Red cubic       |
|    | CoCl <sub>2</sub> | mmol |                      | and 5 mL               |   | single crystal  |
|    |                   |      |                      | H <sub>2</sub> O       |   |                 |
| 84 | 0.1 mmol          | 0.1  | —                    | 2 mL EtOH              | — | Red cubic       |
|    | CoCl <sub>2</sub> | mmol |                      | and 8 mL               |   | single crystal  |
|    |                   |      |                      | H <sub>2</sub> O       |   | (small)         |
| 85 | 0.1 mmol          | 0.1  | —                    | 6 mL EtOH              | — | Red cubic       |
|    | CoCl <sub>2</sub> | mmol |                      | and 4 mL               |   | single crystal  |
|    |                   |      |                      | H <sub>2</sub> O       |   | (small)         |
| 86 | 0.1 mmol          | 0.1  | 0.1 mmol             | 5 mL EtOH              | — | Red cubic       |

|    |                                |              |                                          |                                           |     |                                                            |
|----|--------------------------------|--------------|------------------------------------------|-------------------------------------------|-----|------------------------------------------------------------|
|    | CoCl <sub>2</sub>              | mmol         | H <sub>2</sub> <i>o</i> -bdc             | and 5 mL<br>H <sub>2</sub> O              |     | single crystal<br>(small)                                  |
| 87 | 0.1 mmol<br>CoCl <sub>2</sub>  | 0.1<br>mmol  | 0.1 mmol<br>H <sub>2</sub> <i>p</i> -bdc | 5 mL EtOH<br>and 5 mL<br>H <sub>2</sub> O | —   | Red cubic<br>single crystal<br>(small)                     |
| 88 | 0.1 mmol<br>CoCl <sub>2</sub>  | 0.1<br>mmol  | 0.1 mmol<br>H <sub>2</sub> <i>o</i> -bdc | 5 mL EtOH<br>and 5 mL<br>H <sub>2</sub> O | 3.5 | Red cubic<br>single crystal<br>(small)                     |
| 89 | 0.1 mmol<br>CoCl <sub>2</sub>  | 0.1<br>mmol  | 0.1 mmol<br>1,3,5-H <sub>3</sub> btc     | 5 mL EtOH<br>and 5 mL<br>H <sub>2</sub> O | 4.5 | Red cubic<br>single crystal<br>(small)                     |
| 90 | 0.1 mmol<br>CoCl <sub>2</sub>  | 0.1<br>mmol  | 0.1 mmol<br>1,2,3-H <sub>3</sub> btc     | 5 mL EtOH<br>and 5 mL<br>H <sub>2</sub> O | 4.5 | Red cubic<br>single crystal<br>(small)                     |
| 91 | 0.1 mmol<br>CoCl <sub>2</sub>  | 0.1<br>mmol  | 0.1 mmol<br>1,2,4-H <sub>3</sub> btc     | 5 mL EtOH<br>and 5 mL<br>H <sub>2</sub> O | 4.5 | Red cubic<br>single crystal<br>(small)                     |
| 92 | 0.1 mmol<br>CoCl <sub>2</sub>  | 0.1<br>mmol  | 0.1 mmol<br>1,2,4,5-H <sub>4</sub> btec  | 5 mL EtOH<br>and 5 mL<br>H <sub>2</sub> O | 4.5 | Red cubic<br>single crystal<br>(small)                     |
| 93 | 0.05 mmol<br>CoCl <sub>2</sub> | 0.05<br>mmol | —                                        | 2 mL EtOH<br>and 8 mL<br>H <sub>2</sub> O | —   | Brown block<br>single crystal<br>(small) and red<br>powder |
| 94 | 0.05 mmol<br>CoCl <sub>2</sub> | 0.05<br>mmol | —                                        | 1 mL EtOH<br>and 4 mL<br>H <sub>2</sub> O | —   | Brown block<br>single<br>crystals(small)<br>and red powder |
| 95 | 0.1 mmol                       | 0.1          | —                                        | 8 mL EtOH                                 | —   | Red cubic                                                  |

|     |                               |             |                                       |                                           |   |                                                                 |
|-----|-------------------------------|-------------|---------------------------------------|-------------------------------------------|---|-----------------------------------------------------------------|
|     | CoCl <sub>2</sub>             | mmol        |                                       | and 2 mL<br>H <sub>2</sub> O              |   | single crystal<br>(small)                                       |
| 96  | 0.1 mmol<br>CoCl <sub>2</sub> | 0.1<br>mmol | —                                     | 4 mL EtOH<br>and 6 mL<br>H <sub>2</sub> O | — | Red cubic<br>single crystal<br>(small)                          |
| 97  | 0.1 mmol<br>CoCl <sub>2</sub> | 0.1<br>mmol | 0.1 mmol<br>Imidazole                 | 5 mL EtOH<br>and 5 mL<br>H <sub>2</sub> O | — | Red cubic<br>single crystal<br>(small) and red<br>twin crystals |
| 98  | 0.1 mmol<br>CoSO <sub>4</sub> | 0.1<br>mmol | 0.1 mmol 1,2,3-<br>H <sub>3</sub> btc | 5 mL EtOH<br>and 5 mL<br>H <sub>2</sub> O | — | Orange cubic<br>single crystal<br>(small)                       |
| 99  | 0.1 mmol<br>CoSO <sub>4</sub> | 0.1<br>mmol | —                                     | 2 mL EtOH<br>and 8 mL<br>H <sub>2</sub> O | — | Orange cubic<br>single crystal<br>(small)                       |
| 100 | 0.1 mmol<br>CoSO <sub>4</sub> | 0.1<br>mmol | —                                     | 3 mL EtOH<br>and 7 mL<br>H <sub>2</sub> O | — | Orange cubic<br>single crystal<br>(small)                       |
| 101 | 0.1 mmol<br>CoSO <sub>4</sub> | 0.1<br>mmol | —                                     | 10mL H <sub>2</sub> O                     | — | Orange cubic<br>single crystal<br>and yellow<br>single crystal  |
| 102 | 0.2 mmol<br>CoSO <sub>4</sub> | 0.1<br>mmol | —                                     | 10mL H <sub>2</sub> O                     | — | Orange cubic<br>single crystal<br>and yellow<br>single crystal  |
| 103 | 0.4 mmol<br>CoSO <sub>4</sub> | 0.1<br>mmol | —                                     | 10mL H <sub>2</sub> O                     | — | Orange cubic<br>single crystal<br>and yellow                    |

|     |                               |             |   |                       |   |                                                                                                              |
|-----|-------------------------------|-------------|---|-----------------------|---|--------------------------------------------------------------------------------------------------------------|
| 104 | 0.1 mmol<br>CoSO <sub>4</sub> | 0.2<br>mmol | — | 10mL H <sub>2</sub> O | — | single crystal<br>Orange cubic<br>single crystal<br>(small), brown<br>powder and<br>yellow single<br>crystal |
|-----|-------------------------------|-------------|---|-----------------------|---|--------------------------------------------------------------------------------------------------------------|
